# Supplementary material for: Biochemical Characterization of the Copper Nitrite Reductase from Neisseria gonorrhoeae
Source: MDPI journal article supplement (doi:10.3390/biom13081215), 2023-08-04
Supplement: s1 [file s1]

## Supplementary Materials

### Biochemical Characterization of the Copper Nitrite Reductase from *Neisseria gonorrhoeae*

Daniela S. Barreiro<sup>1,2</sup>, Ricardo N. S. Oliveira<sup>1,2</sup>, Sofia R. Pauleta<sup>1,2,\*</sup>

<sup>1</sup> Microbial Stress Lab, UCIBIO—Applied Molecular Biosciences Unit, Department of Chemistry, NOVA School of Science and Technology, Universidade NOVA de Lisboa, 2829-516 Caparica, Portugal.

<sup>2</sup> Associate Laboratory i4HB—Institute for Health and Bioeconomy, NOVA School of Science and Technology, Universidade NOVA de Lisboa, 2829-516 Caparica, Portugal.

#### Corresponding Author:

Sofia R. Pauleta

Microbial Stress Lab, UCIBIO—Applied Molecular Biosciences Unit, Department of Chemistry, NOVA School of Science and Technology, Universidade NOVA de Lisboa, 2829-516 Caparica, Portugal.

Tel. +351 212948385, ext 10967

Fax. + 351 351 212 948 550

E-mail: sofia.pauleta@fct.unl.pt

#### INDEX

|                                                                                             |    |
|---------------------------------------------------------------------------------------------|----|
| <b>S1.</b> Primary sequence alignment                                                       | S2 |
| <b>S2.</b> Schematic representation of the construct used to heterologously produce NgCuNiR | S3 |
| <b>S3.</b> Oligomeric state of NgCuNiR                                                      | S3 |
| <b>S4.</b> Geometry of T1Cu center of NgCuNiR                                               | S4 |
| <b>S5.</b> Thermostability of NgCuNiR                                                       | S5 |

## S1. Primary sequence alignment

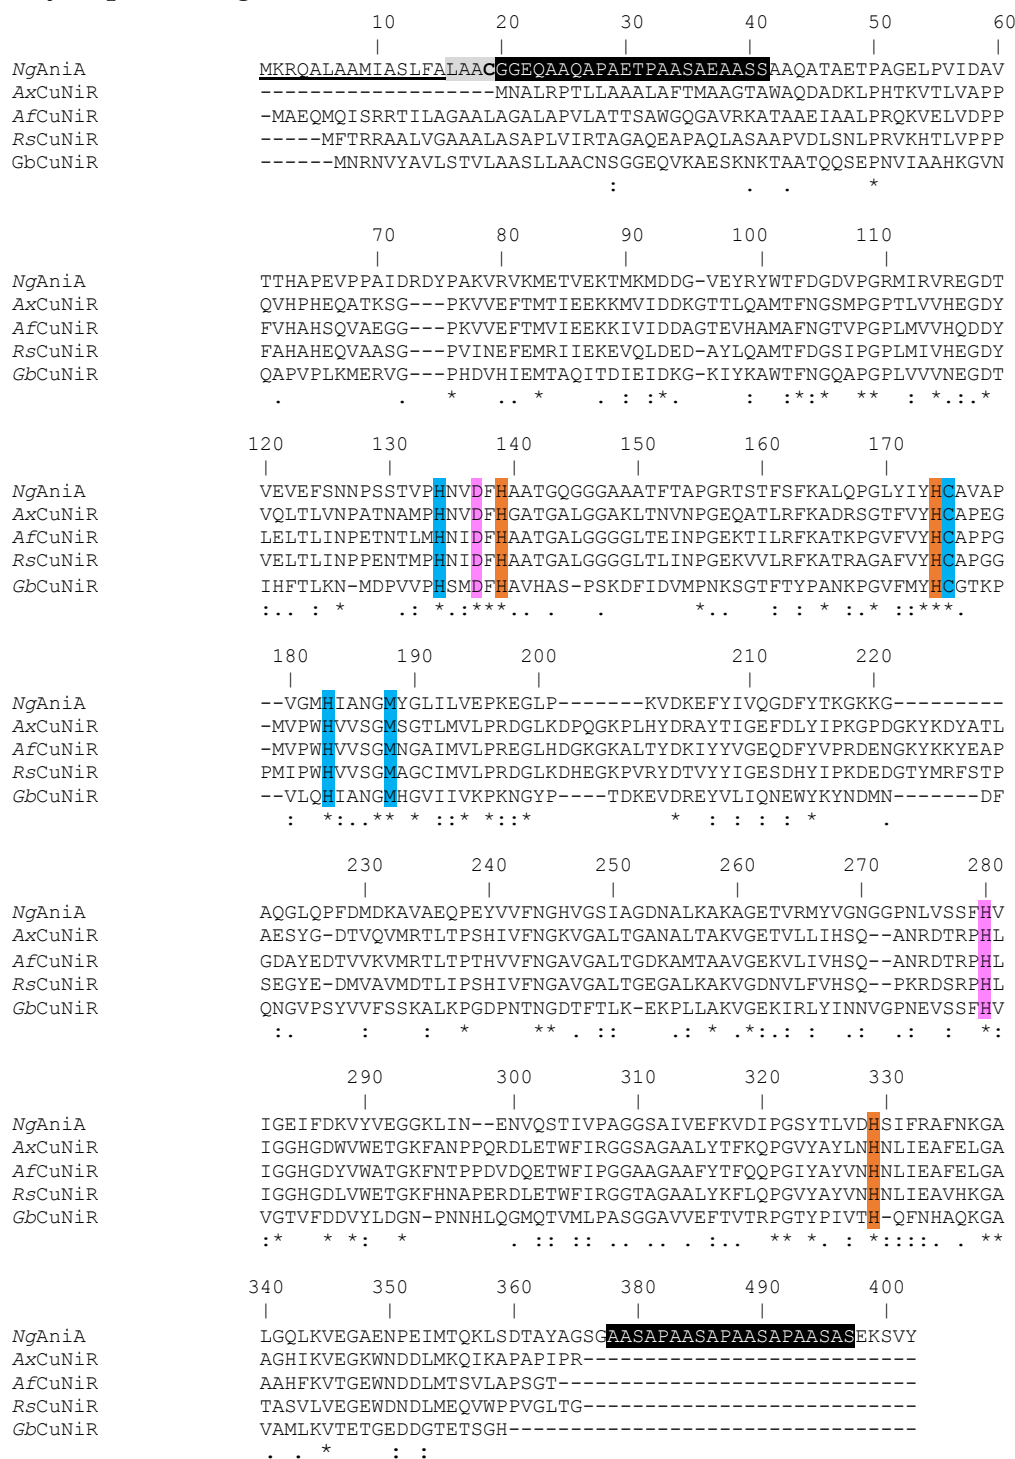

**Figure S1.** Multiple primary sequence alignment of copper nitrite reductases from *N. gonorrhoeae* (NgAniA, WP\_003700168.1), *A. xylosoxidans* (AxCuNiR, BAA33678.1), *A. faecalis* (AfCuNiR, D13155.1), *R. sphaeroides* (RsCuNiR, AAB05767.1) and *G. thermodenitrificans* (GbCuNiR, ATO36858.1). Homology code: asterisks, colons or stops below the sequence indicate identity, high conservation, or conservation of the amino acids, respectively. Legend: underlined – signal peptide, bold - palmitoylation site, grey - peptidase II cleavage site, black - tandem repeated regions, orange - residues coordinating T2Cu center, blue - residues coordinating T1Cu center, pink - catalytically important residues, Aps99 and His240. Sequence alignment performed with ClustalOmega (EMBL-EBI).

## S2. Schematic representation of the construct used to heterologously produce NgCuNiR

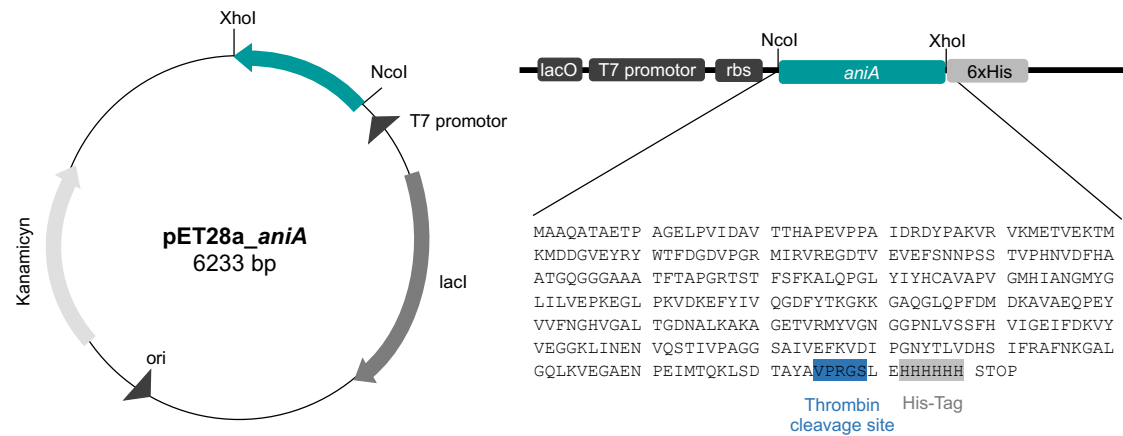

**Figure S2.** Schematic representation of the construct for NgCuNiR production.

## S3. Oligomeric state of NgCuNiR

The oligomeric state of NgCuNiR was confirmed by size exclusion chromatography to be a homotrimer. In fact, the apparent molecular mass of NgCuNiR was determined to be  $96 \pm 10$  kDa, and since the expected molecular mass of the trimer is 109.5 kDa ( $3 \times 36384$  Da from the polypeptide chain plus  $6 \times 63.55$  Da from the copper atoms) and of the monomer is 36.5 kDa, the oligomerization state would be  $96/36.5 = 2.6$ . The low value can be explained knowing that the molecular mass determined by gel filtration is affected by the shape and hydrodynamic radius of the protein.

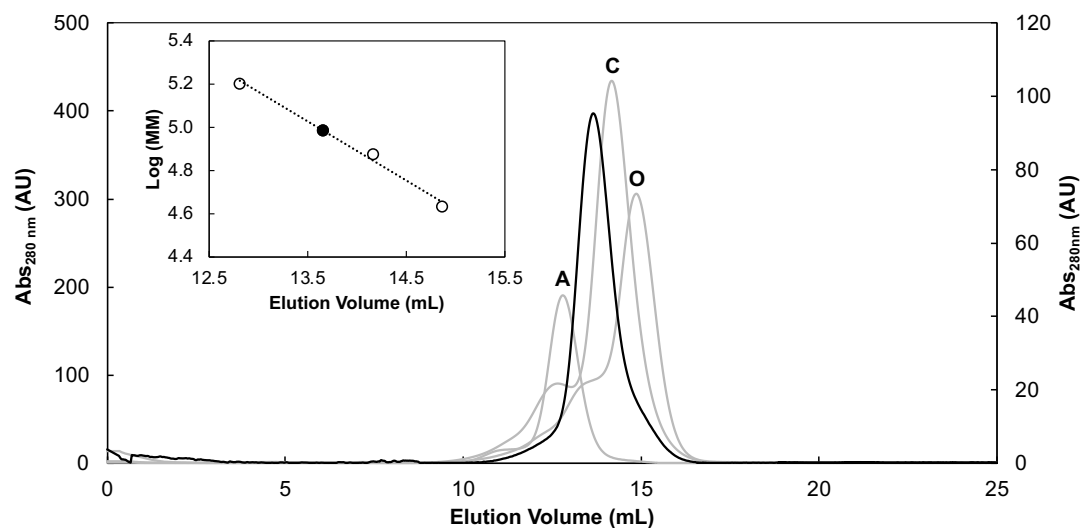

**Figure S3.** Molecular size exclusion chromatography of as-isolated NgCuNiR (96 kDa, black line). In grey are the elution profiles of standard proteins used to estimate the apparent molecular weight: Aldolase (A, 158 kDa), Conalbumin (C, 75 kDa), Ovalbumin (O, 44 kDa). Inset: Logarithm of the molecular weight of the standard proteins (open circles) as a function of elution volume used to determine the molecular weight of NgCuNiR (filled circle). Experimental conditions are described in Materials and Methods.

## S4. Geometry of T1Cu center of NgCuNiR

The geometry of T1Cu centers of blue *Alcaligenes xylosoxidans* CuNiR, bluish-green *NgCuNiR* and green *Achromobacter cycloclastes* CuNiR are compared in Figure S4 and Table S1. In Table S1 is also presented the bond length and angles of the copper center of *Paracoccus pantotrophus* pseudoazurin.

**Table S1.** Copper-ligand distances and bond angles of T1Cu center from CuNiRs of the different classes and of pseudoazurin.

| CuNiR class                           | Blue          | Bluish-Green | Green        | Pseudoazurin |
|---------------------------------------|---------------|--------------|--------------|--------------|
| PDB identifier                        | 1OE1 (1.04 Å) | 1KBW (2.4 Å) | 2BW4 (0.9 Å) | 3ERX (1.4 Å) |
| Distance (Å)                          |               |              |              |              |
| His <sub>1</sub> -Cu                  | 2.02          | 1.99         | 2.04         | 2.13         |
| His <sub>2</sub> -Cu                  | 2.20          | 2.10         | 2.23         | 2.11         |
| Cys-Cu                                | 2.03          | 1.90         | 2.03         | 2.13         |
| Met-Cu                                | 2.45          | 2.61         | 2.49         | 2.75         |
| Angle (°)                             |               |              |              |              |
| His <sub>1</sub> -Cu-Cys              | 122           | 128          | 127          | 136          |
| His <sub>1</sub> -Cu-His <sub>2</sub> | 101           | 108          | 101          | 106          |
| His <sub>1</sub> -Cu-Met              | 88            | 82           | 86           | 82           |
| Cys-Cu-His <sub>2</sub>               | 114           | 105          | 108          | 113          |
| Cys-Cu-Met                            | 114           | 108          | 108          | 111          |
| His <sub>2</sub> -Cu-Met              | 116           | 128          | 127          | 108          |
| Dihedral angle (φ) <sup>a</sup>       | 74.3          | 61.6         | 65.5         | 76.2         |

<sup>a</sup> Dihedral angle (φ) measured between the planes His<sub>1</sub>N<sup>δ1</sup>-Cu-His<sub>2</sub>N<sup>δ1</sup> and MetS<sup>δ</sup>-Cu-CysS<sup>γ</sup>.

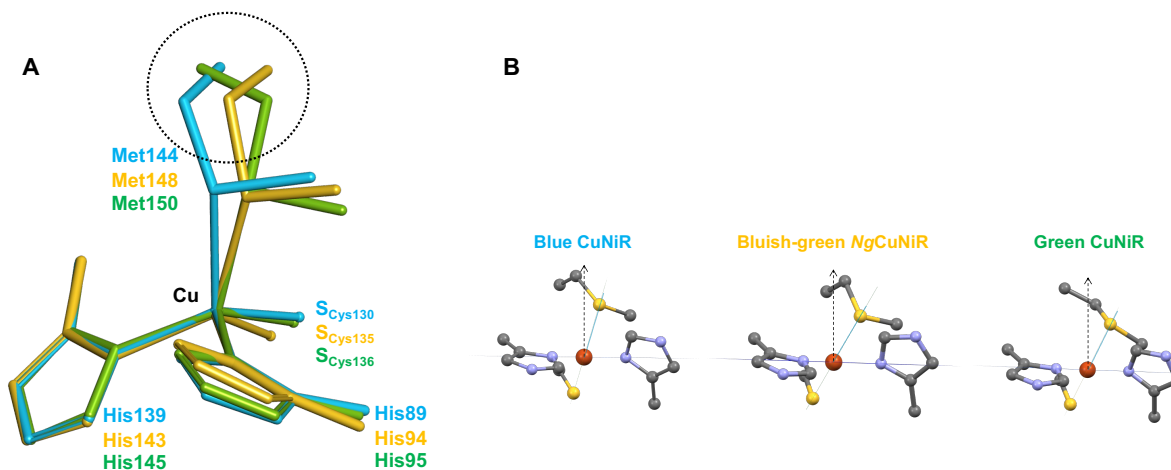

**Figure S4.** Comparison of T1Cu center geometry between different classes of CuNiRs. In Panel (A) is shown the superposition of the structures of the blue CuNiR from *Alcaligenes xylosoxidans* (PDB ID 1OE1) (in blue), the bluish-green CuNiR from *Neisseria gonorrhoeae* (PDB ID 1KBW) (in orange), and of the green CuNiR from *Achromobacter cycloclastes* (PDB ID 2BW4) (in green). The circle highlights the different conformation of the Met ligand which adopts a “gauche” conformation in blue and bluish-green CuNiRs and a “trans (anti)” conformation in green CuNiR. In Panel (B) is shown the deviation of axial ligand Met from the His<sub>1</sub>-Cu-His<sub>2</sub> plane, using the same structures.

## S5. Thermostability of NgCuNiR

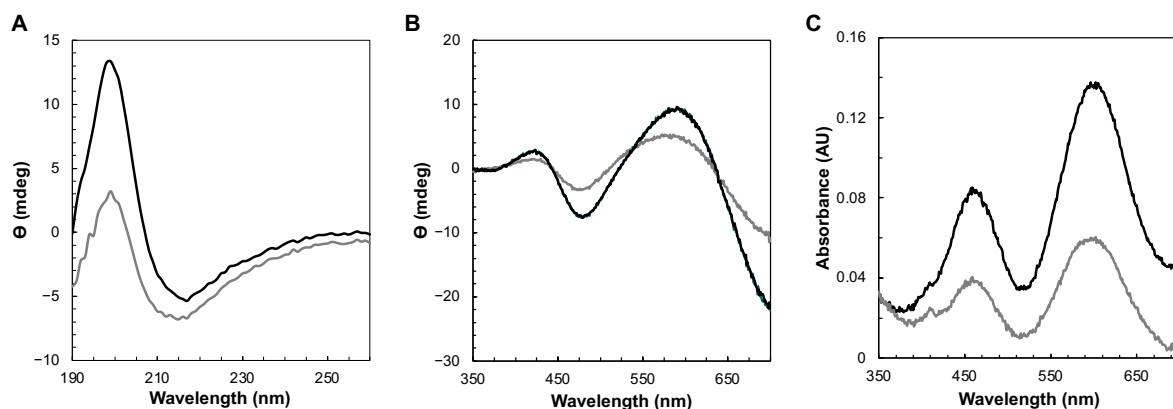

**Figure S5.** Overlay of the spectra of NgCuNiR acquired at 20 °C before and after the temperature ramp. (A) CD spectra in the far-UV region; (B) CD spectra in the visible region; (C) Absorption spectra in the visible region.

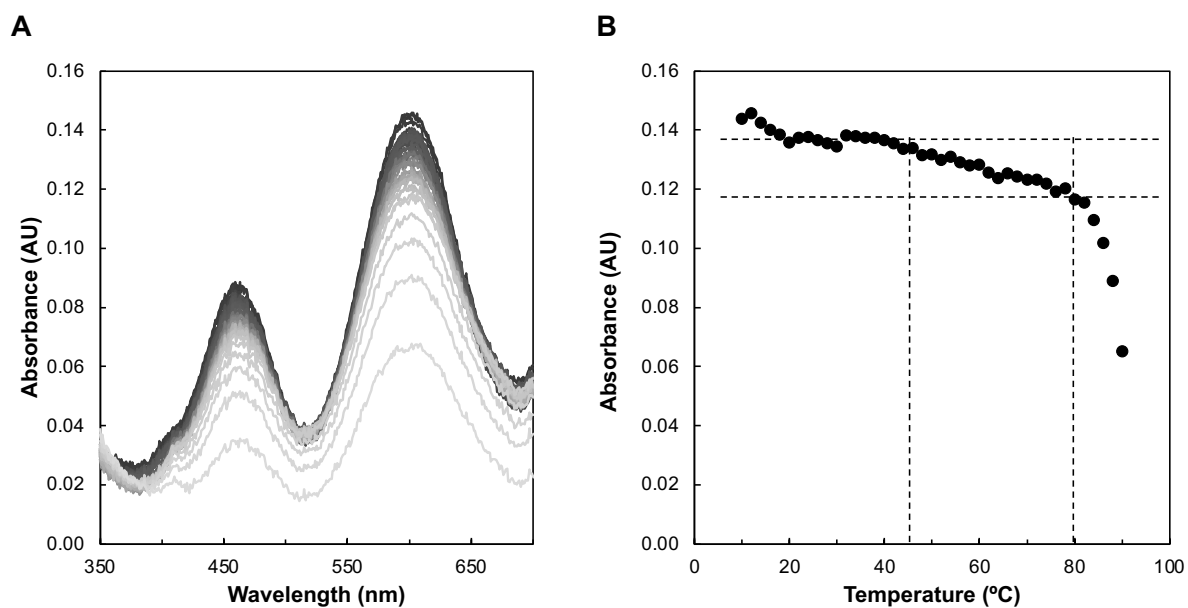

**Figure S6.** Thermostability of NgCuNiR studied by absorption spectroscopy. (A) UV-visible spectra of as-isolated NgCuNiR as a function of temperature, from black (10 °C) to light grey (90 °C). (B) Profile of the absorbance at 598 nm as a function of temperature. These spectra were collected simultaneously with the CD spectra in the visible region presented in Figure 4B.
